# Supplementary material for: Identifying single-strain growth patterns of human gut microbes in response to preterm human milk and formula
Source: Royal Society of Chemistry journal article supplement (doi:10.1039/d2fo00447j), 2022-01-01
Supplement: d2fo00447j1.pdf [file d2fo00447j1.pdf]

**Supplemental Table 1.**

| Characteristics          | Mothers (n=3)    |
|--------------------------|------------------|
| Age at delivery (y)      | 31±3             |
| Infant GA at birth (wk)  | 26±1             |
| Infant BW (g)            | 677±172          |
| Post-partum day (listed) | 5, 6, 5          |
| Dietary restrictions*    | None             |
| Race <sup>‡</sup>        | 2 White, 1 Black |

**Supplemental Table 1.** Maternal details for preterm milk samples. Averages in mean ± SD, unless stated. Documented in medical record.<sup>‡</sup>All patients were non-Hispanic.

**Supplemental Table 2.**

| Bacteria              | Strains    | Media Control | Stdev    | Human Milk | Stdev    | Preterm Formula | Stdev    | Term Formula | Stdev    |
|-----------------------|------------|---------------|----------|------------|----------|-----------------|----------|--------------|----------|
| <i>B. infantis</i>    | ATCC 15697 | 2.12E+08      | 3.35E+07 | 3.14E+08   | 1.09E+07 | 3.28E+08        | 3.10E+07 | 3.20E+08     | 1.59E+07 |
| <i>B. breve</i>       | ATCC 15698 | 1.35E+08      | 2.32E+07 | 2.47E+08   | 2.57E+07 | 2.67E+08        | 4.68E+07 | 2.69E+08     | 3.79E+07 |
| <i>B. bifidum</i>     | MIMB       | 1.36E+08      | 1.36E+08 | 4.41E+08   | 3.60E+07 | 3.59E+08        | 2.83E+07 | 2.63E+08     | 2.30E+07 |
| <i>B. angulatum</i>   | ATCC 27535 | 1.33E+08      | 2.07E+07 | 5.94E+08   | 5.82E+06 | 3.04E+08        | 7.93E+07 | 2.50E+08     | 5.66E+06 |
| <i>B. animalis</i>    | Bi-07      | 1.33E+08      | 1.55E+07 | 6.37E+08   | 3.51E+06 | 3.16E+08        | 4.98E+07 | 2.80E+08     | 5.77E+07 |
| <i>B. longum</i>      | ATCC 55813 | 1.30E+08      | 5.01E+06 | 3.68E+08   | 2.80E+07 | 2.61E+08        | 1.07E+06 | 1.60E+08     | 1.32E+07 |
|                       |            |               |          |            |          |                 |          |              |          |
| <i>B. dentium</i>     | ATCC 27678 | 1.42E+08      | 1.86E+07 | 6.23E+08   | 4.09E+07 | 2.22E+08        | 2.69E+07 | 1.87E+08     | 1.95E+06 |
| <i>B. gallicum</i>    | ATCC 20093 | 1.33E+08      | 3.76E+07 | 6.31E+08   | 2.55E+06 | 2.46E+08        | 2.56E+07 | 2.42E+08     | 7.52E+06 |
| <i>L. acidophilus</i> | ATCC 4796  | 1.37E+08      | 6.02E+06 | 2.20E+08   | 3.32E+06 | 2.56E+08        | 5.01E+06 | 1.79E+08     | 3.09E+06 |
| <i>L. johnsonii</i>   | ATCC 33200 | 1.44E+08      | 5.92E+06 | 2.10E+08   | 6.98E+06 | 2.46E+08        | 1.38E+07 | 1.81E+08     | 9.84E+06 |
| <i>L. paracasei</i>   | ATCC 25302 | 1.81E+08      | 5.79E+06 | 2.28E+08   | 2.37E+06 | 2.81E+08        | 6.93E+06 | 2.31E+08     | 1.29E+07 |
| <i>L. plantarum</i>   | ATCC 14917 | 2.24E+08      | 1.98E+07 | 2.83E+08   | 6.88E+06 | 3.90E+08        | 1.42E+07 | 3.26E+08     | 4.90E+06 |
| <i>L. fermentum</i>   | ATCC 14931 | 1.45E+08      | 6.93E+06 | 2.30E+08   | 8.08E+06 | 2.01E+08        | 1.05E+07 | 2.13E+08     | 1.26E+07 |
| <i>L. gasseri</i>     | ATCC 3323  | 1.36E+08      | 8.46E+06 | 2.30E+08   | 9.00E+06 | 2.27E+08        | 6.31E+06 | 1.81E+08     | 8.78E+06 |
| <i>L. delbrueckii</i> | ATCC 11842 | 1.39E+08      | 3.62E+06 | 2.13E+08   | 1.02E+07 | 2.24E+08        | 7.63E+06 | 1.76E+08     | 7.94E+06 |
| <i>L. brevis</i>      | ATCC 27303 | 1.28E+08      | 1.13E+07 | 1.92E+08   | 1.23E+07 | 2.81E+08        | 8.89E+06 | 1.58E+08     | 1.53E+07 |
| <i>S. salivarius</i>  | ATCC 13419 | 8.13E+08      | 2.41E+07 | 6.50E+08   | 1.89E+07 | 9.9+0E+08       | 4.42E+07 | 9.73E+08     | 6.01E+07 |
| <i>S. sanguinis</i>   | ATCC 49296 | 4.36E+08      | 1.87E+07 | 8.87E+08   | 1.49E+07 | 1.32E+09        | 1.06E+08 | 7.68E+08     | 3.00E+07 |

|                         |             |          |          |          |          |          |          |          |          |
|-------------------------|-------------|----------|----------|----------|----------|----------|----------|----------|----------|
| <i>S. parasanguinis</i> | ATCC 15912  | 5.54E+08 | 8.16E+07 | 8.87E+08 | 1.49E+07 | 1.04E+09 | 1.20E+07 | 7.68E+08 | 3.00E+07 |
| <i>S. thermophilus</i>  | ATCC 491    | 1.35E+09 | 1.82E+08 | 7.77E+08 | 5.24E+07 | 1.46E+09 | 2.50E+07 | 1.42E+09 | 2.68E+08 |
| <i>S. pyogenes</i>      | CB1         | 7.34E+08 | 9.18E+07 | 8.12E+08 | 1.62E+08 | 9.36E+08 | 7.58E+07 | 8.58E+08 | 2.33E+07 |
| <i>S. mitis</i>         | ATCC 6249   | 1.09E+09 | 1.28E+08 | 1.24E+09 | 2.18E+08 | 1.13E+09 | 1.14E+07 | 9.90E+08 | 3.28E+08 |
| <i>S. pasteurians</i>   | ATCC 49133  | 1.05E+09 | 2.39E+08 | 1.05E+09 | 6.20E+07 | 1.15E+09 | 1.20E+07 | 9.12E+08 | 1.10E+08 |
| <i>S. oralis</i>        | ATCC 35037  | 1.17E+09 | 1.45E+08 | 8.92E+08 | 8.66E+07 | 1.05E+09 | 8.48E+07 | 1.30E+09 | 2.27E+08 |
| <i>E. faecalis</i>      | NCTC 775    | 2.81E+08 | 3.11E+07 | 5.13E+08 | 1.12E+07 | 1.34E+09 | 9.32E+07 | 1.19E+09 | 6.40E+07 |
| <i>E. faecium</i>       | ATCC 8459   | 2.46E+08 | 1.35E+07 | 4.87E+08 | 1.03E+08 | 1.02E+09 | 1.33E+08 | 1.23E+09 | 5.12E+07 |
| <i>E. faecium</i>       | NCTC 12204  | 6.15E+08 | 1.81E+08 | 9.83E+08 | 1.06E+08 | 1.17E+09 | 3.95E+07 | 1.21E+09 | 1.44E+08 |
| <i>K. aerogenes</i>     | CB1         | 1.78E+08 | 4.51E+07 | 3.33E+08 | 4.13E+07 | 1.24E+09 | 2.36E+08 | 7.91E+08 | 8.63E+07 |
| <i>K. aerogenes</i>     | ATCC 35029  | 2.54E+08 | 8.71E+07 | 5.80E+08 | 4.05E+07 | 1.36E+09 | 1.04E+08 | 1.08E+09 | 3.92E+07 |
| <i>K. pneumoniae</i>    | ATCC 700607 | 2.64E+08 | 1.15E+08 | 5.83E+08 | 5.97E+06 | 1.31E+09 | 6.53E+06 | 8.96E+08 | 2.97E+07 |
| <i>K. pneumoniae</i>    | ATCC 13883  | 1.80E+08 | 5.93E+07 | 7.18E+08 | 3.70E+07 | 1.27E+09 | 2.07E+08 | 1.28E+09 | 2.51E+07 |
| <i>K. pneumoniae</i>    | ATCC 35657  | 2.00E+08 | 1.09E+08 | 7.57E+08 | 1.43E+07 | 1.22E+09 | 1.18E+08 | 1.24E+09 | 4.67E+07 |

**Supplemental Table 2:** Bacteria strain is listed with the designation, cell count of growth that was monitored after anaerobic incubation at 20 hr by measuring OD<sub>600nm</sub>. OD<sub>600nm</sub> measurements were back-calculated to standard curves made from the bacteria using the Quantum Tx Bacterial Cell Counter (Logos Biosystems). Each experiment was performed two independent times in triplicate.
